# Supplementary material
Source: Research Square preprint supplement (doi:10.21203/rs.3.rs-9058916/v1)

Supplementary: Western blot uncropped data

**Chebulagic acid limits mTOR activity leading to TFEB-driven autophagy and lysosomal biogenesis to suppress the arecoline-induced NLRP3-mediated inflammasome axis in OSCC**

**Authors:**

Prakash Kumar Senapati 1, Amruta Singh1, Rakesh Kumar Kar1, Kewal Kumar Mahapatra2, Swatilekha Maiti3, Mrutyunjay Jena4, Sujit Kumar Bhutia1, *

1Cancer and Cell Death Laboratory, Department of Life Science, National Institute of Technology Rourkela, Rourkela, 769008, Odisha, India

***Corresponding Author**

Sujit Kumar Bhutia, Professor, Department of Life Science, National Institute of Technology Rourkela, Rourkela-769008, Odisha, India, Phone: 91-6612462686, Fax. 91661-2472926, E-mail: sujitb@nitrkl.ac.in, [bhutiask@gmail.com](mailto:bhutiask@gmail.com)

**Western blot uncropped data**


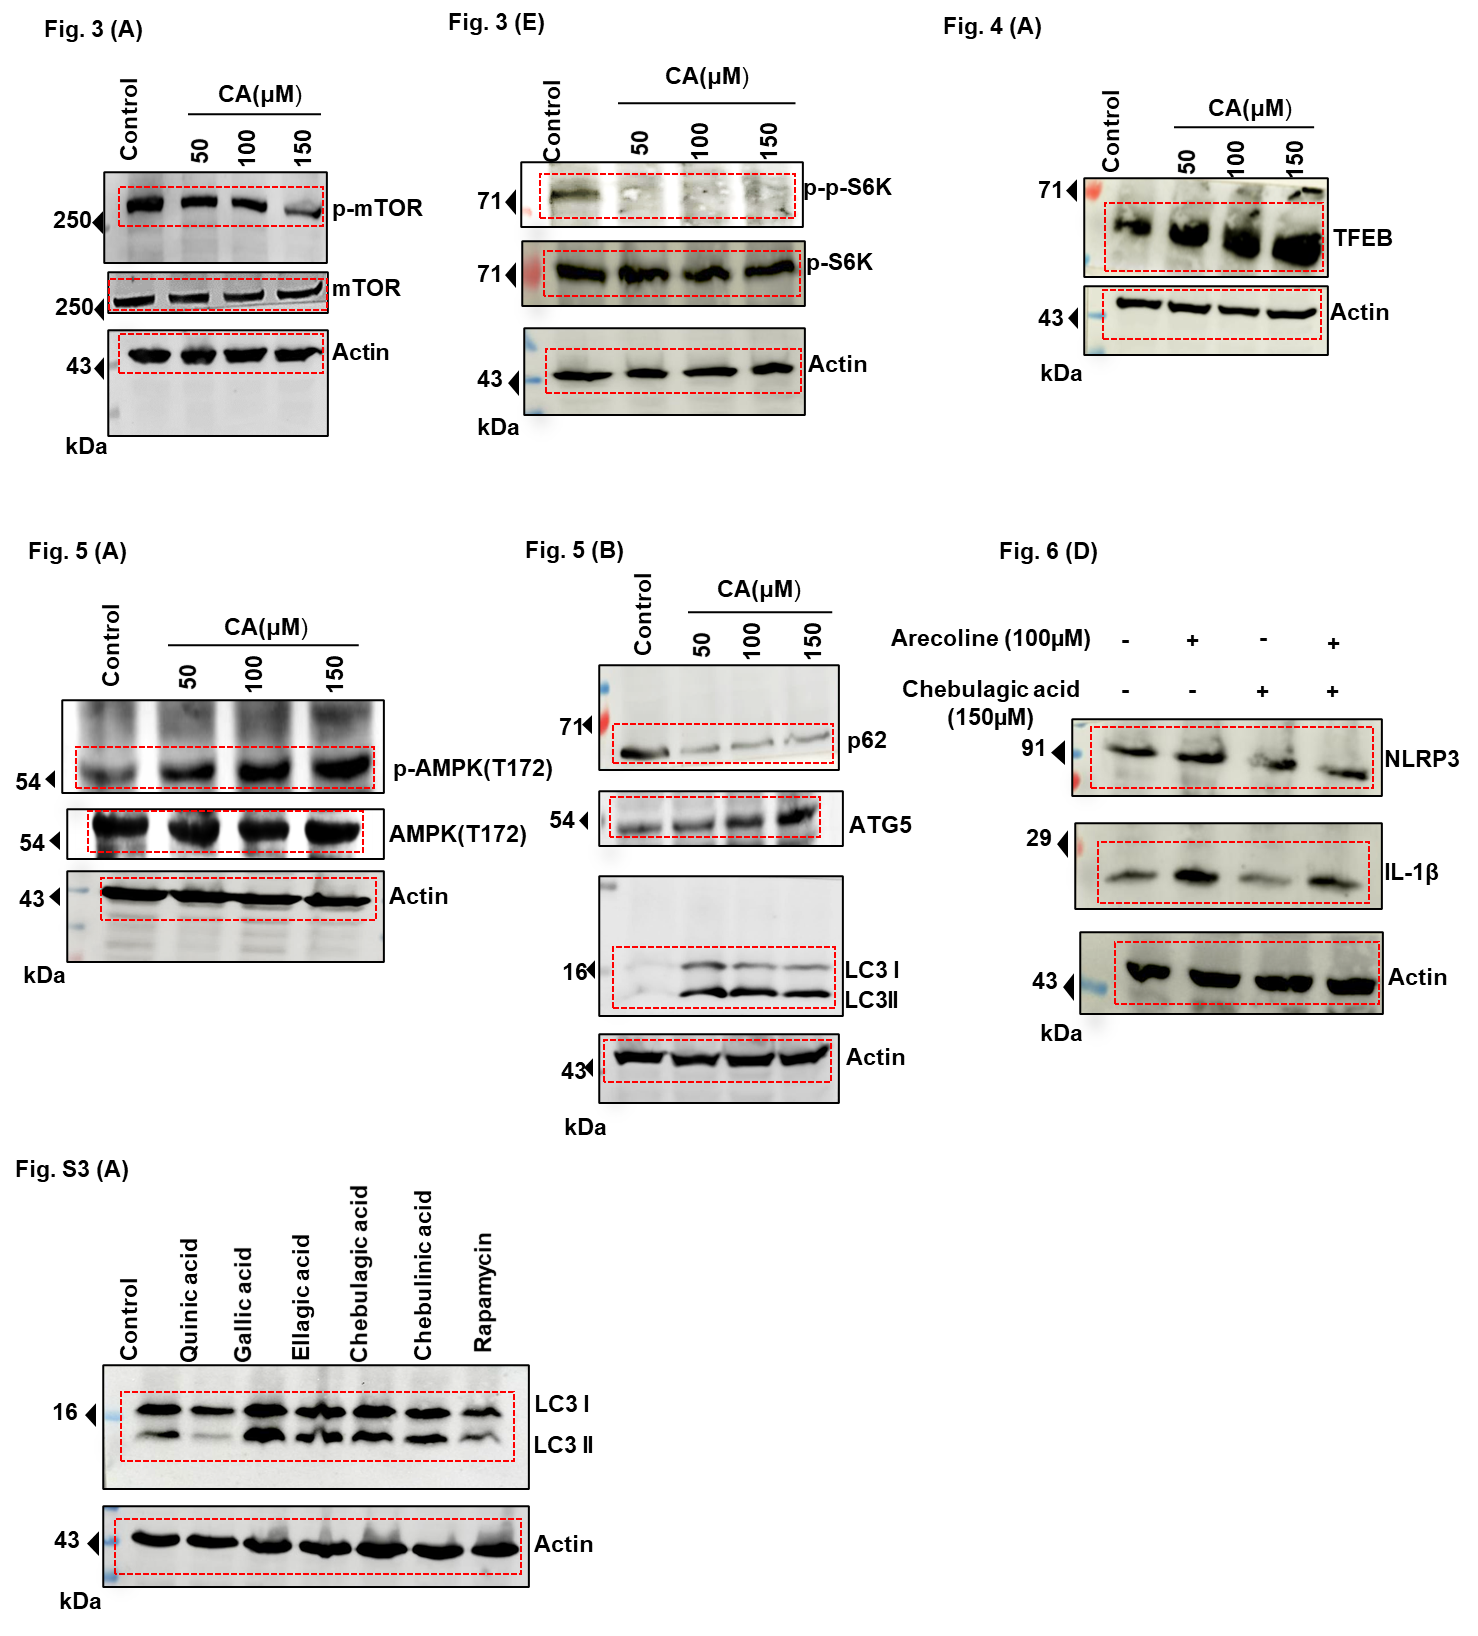

Supplement: Supplementary file 1 [file 5bb3a93cd52ff9db895cfd0e.docx]
